1       **The citrate transporter SLC13A5 as a therapeutic target for kidney disease:**  
2       **evidence from Mendelian randomization to inform drug development**

3

4       Dipender Gill BMBCh PhD<sup>1,2</sup>, Loukas Zagkos PhD<sup>1</sup>, Rubinder Gill MSc<sup>2</sup>, Thomas Benzing  
5       MD<sup>3,4</sup>, Jens Jordan MD<sup>5,6</sup>, Andreas L. Birkenfeld MD<sup>7-9</sup>, Stephen Burgess PhD<sup>10</sup>, Grit Zahn  
6       PhD<sup>11</sup>

7

- 8       1. Department of Epidemiology and Biostatistics, School of Public Health, Imperial College  
9       London, London, United Kingdom.
- 10      2. Primula Group Ltd, London, United Kingdom.
- 11      3. Department II of Internal Medicine and Center for Molecular Medicine Cologne (CMMC),  
12      University of Cologne, Faculty of Medicine and University Hospital Cologne, Cologne,  
13      Germany.
- 14      4. Cologne Excellence Cluster on Cellular Stress Responses in Aging-Associated Diseases  
15      (CECAD), University of Cologne, Germany.
- 16      5. Institute of Aerospace Medicine, German Aerospace Center (DLR), Cologne, Germany.
- 17      6. Medical Faculty, University of Cologne, Cologne, Germany.
- 18      7. Department of Diabetology Endocrinology and Nephrology, Internal Medicine IV, University  
19      Hospital Tübingen, Eberhard Karls University Tübingen, Tübingen, Germany.
- 20      8. Division of Translational Diabetology, Institute of Diabetes Research and Metabolic Diseases  
21      (IDM) of the Helmholtz Center Munich, Eberhard Karls University Tübingen, Tübingen,  
22      Germany, a partner of the German Center for Diabetes Research (DZD e.V.).
- 23      9. Department of Diabetes, School of Life Course Science and Medicine, King's College London,  
24      London, United Kingdom.
- 25      10. Medical Research Council Biostatistics Unit at the University of Cambridge, Cambridge,  
26      United Kingdom.
- 27      11. Eternygen GmbH, Berlin, Germany.

28

29      **Corresponding author details:**

30      Dr Dipender Gill

31      Department of Epidemiology and Biostatistics, School of Public Health, Imperial College London,  
32      London, United Kingdom

33      Telephone: +44 7904843810

34      E-mail: [dipender.gill@imperial.ac.uk](mailto:dipender.gill@imperial.ac.uk)

35

36

37      **Manuscript word count: 3,408**

38 **Abstract** (386 words)

39 Background: Solute carrier family 13 member 5 (SLC13A5) is a Na<sup>+</sup>-coupled citrate co-transporter  
40 that mediates the entry of extracellular citrate into the cytosol. SLC13A5 inhibition has been  
41 proposed as a therapeutic target for reducing progression of kidney disease via its effects on citrate  
42 metabolism. However, evidence of its efficacy in humans is limited. The aim of this study was to  
43 leverage the Mendelian randomization paradigm to gain insight into the effects of SLC13A5 inhibition  
44 in humans, towards prioritizing and informing clinical development efforts.

45 Methods: The primary Mendelian randomization analyses investigated the effect of SLC13A5  
46 inhibition on measures of kidney function, including creatinine and cystatin C based measures of  
47 estimated glomerular filtration rate (creatinine-eGFR and cystatin C-eGFR), blood urea nitrogen  
48 (BUN), urine albumin-creatinine ratio (uACR), and risk of chronic kidney disease and  
49 microalbuminuria. Secondary analyses included a paired plasma and urine metabolome-wide  
50 association study, investigation of secondary traits related to SLC13A5 biology, a phenome-wide  
51 association study (PheWAS), and a proteome-wide association study. All analyses were compared to  
52 the effect of genetically predicted plasma citrate levels using variants selected from across the  
53 genome, and statistical sensitivity analyses robust to the inclusion of pleiotropic variants were also  
54 performed. Data were obtained from large scale genetic consortia and biobanks, with sample sizes  
55 ranging from 5,023 to 1,320,016 individuals.

56 Results: We found evidence of associations between genetically proxied SLC13A5 inhibition and  
57 higher creatinine-eGFR ( $p=0.002$ ), cystatin C-eGFR ( $p=0.005$ ), and lower BUN ( $p=3\times 10^{-3}$ ). Statistical  
58 sensitivity analyses robust to the inclusion of pleiotropic variants suggested that these effects may be  
59 a consequence of higher plasma citrate levels. There was no strong evidence of associations of  
60 genetically proxied SLC13A5 inhibition with uACR or risk of CKD or microalbuminuria. Secondary  
61 analyses also identified evidence of associations with higher plasma calcium levels ( $p=6\times 10^{-13}$ ) and  
62 lower fasting glucose ( $p=0.02$ ). PheWAS did not identify any safety concerns.

63 Conclusion: This Mendelian randomization analysis provides human-centric insight to guide clinical  
64 development of an SLC13A5 inhibitor. We identify plasma calcium and citrate as biologically plausible  
65 biomarkers of target engagement, and plasma citrate as a potential biomarker of mechanism of  
66 action. Our human genetic evidence corroborates evidence from various animal models to support  
67 effects of SLC13A5 inhibition on improving kidney function. Further study in the form of early-stage  
68 clinical trials may now be warranted to help translate these findings towards improving patient care.

69

70 **Key words**

71 SLC13A5, citrate, kidney, renal function, Mendelian randomization, drug development

72 **Acronyms**

73 BUN: blood urea nitrogen

74 CI: confidence interval

75 CKD: chronic kidney disease

76 CRP: c-reactive protein

77 eGFR: estimated glomerular filtration rate

78 FDR: false-discovery rate

79 GWAS: genome-wide association study

80 HDLc: high-density lipoprotein cholesterol

81 IL6: interleukin-6

82 IVW: inverse-variance weighted

83 LDLc: low-density lipoprotein cholesterol

84 OR: odds ratio

85 PheWAS: phenome-wide association study

86 SD: standard deviation

87 SNP: single-nucleotide polymorphism

88 uACR: urine albumin-creatinine ratio

## 89 Introduction

90 The kidney is a highly metabolically active organ. The provision of citric acid cycle intermediates has  
91 ameliorated renal tubular damage and progression of chronic renal injury in animal models [1–3].  
92 Solute carrier family 13 member 5 (SLC13A5), which is primarily expressed in hepatocytes of the liver,  
93 is a membrane-bound Na<sup>+</sup>-coupled co-transporter responsible for moving extracellular citrate into  
94 the cytosol [4,5]. Systemic SLC13A5 inhibition could augment citrate flux to the kidney, thereby  
95 supporting renal energy metabolism. Moreover, given the role of citrate in regulating glucose  
96 metabolism, lipid metabolism, and inflammation, SLC13A5 inhibition could indirectly affect renal  
97 health [6–13]. However, no SLC13A5 inhibitor has yet entered clinical study, and so evidence of its  
98 efficacy for ameliorating progression of kidney disease in humans is limited. Additionally, SLC13A5  
99 shows species-specific effects [11,14–16].

100 Insights from human genetic data offer a powerful opportunity to prioritize and inform the design of  
101 clinical research. Given that learnings from such genetic analyses relate to the target organism,  
102 namely humans, they are well-placed to overcome some of the limitations of translating findings  
103 from animal models [17]. As genes code for proteins and proteins make up the majority of drug  
104 targets, it follows that naturally occurring variation in the genes coding for drug target proteins can  
105 be leveraged to inform on the effect of their pharmacological perturbation [18]. The random  
106 allocation of genetic variants at conception means that their association with clinical traits and  
107 phenotypes are less susceptible to the confounding factors and reverse causation bias that can  
108 hinder causal inference in traditional epidemiological study designs. The current availability of  
109 publicly accessible large-scale genetic association data also means that such a drug-target Mendelian  
110 randomization paradigm is a relatively fast and cost-effective approach for inferring the potential  
111 clinical effects of perturbing drug targets [19].

112 Given the pre-clinical evidence supporting potential therapeutic applications of SLC13A5 inhibition  
113 [10,12,13,20,21], we sought to investigate its effects using drug target Mendelian randomization. By  
114 utilizing the known effect of SLC13A5 inhibition on increasing plasma citrate levels to identify genetic  
115 instruments [10,22,23], our primary objective was to investigate its effects on parameters of kidney  
116 function. In secondary analyses, we aimed to unravel potential mechanisms of action, as well as  
117 evidence of broader effects on glucose and lipid metabolism, and inflammation. Such insights would  
118 thus serve to inform and prioritize clinical development efforts for SLC13A5 inhibitors.

## 119 **Methods**

### 120 ***Study design overview***

121 Genetic instruments for SLC13A5 inhibition were first identified as minimally correlated ( $r^2 < 0.1$ )  
122 single-nucleotide polymorphisms (SNPs) within 200kB of the *SLC13A5* gene (chromosome 17, base  
123 position 6,588,032 to 6,616,886 on reference panel GRCh37/hg19 by Ensembl) that associate with  
124 plasma citrate levels at a genome-wide significance level ( $p < 5 \times 10^{-8}$ ). Instrument validity was affirmed  
125 by performing Mendelian randomization to explore associations with plasma calcium levels, whose  
126 levels are postulated to be increased with SLC13A5 inhibition due to reduced sequestration in the  
127 bone [24]. Such an association would also support plasma calcium as a biomarker of target  
128 engagement for SLC13A5 inhibition.

129 Primary Mendelian randomization analyses were then performed to investigate the association of  
130 genetically proxied SLC13A5 inhibition with creatinine and cystatin C based measures of estimated  
131 glomerular filtration rate (eGFR), blood urea nitrogen (BUN), urine albumin-creatinine-ratio (uACR),  
132 and risk of microalbuminuria and chronic kidney disease (CKD).

133 To investigate whether any effect of SLC13A5 inhibition on parameters of kidney function may be  
134 attributable to metabolic effects in the plasma that consequently affect kidney function,  
135 metabolome-wide Mendelian randomization of the plasma and urine was undertaken for SLC13A5  
136 inhibition. Evidence of concordant effects of SLC13A5 inhibition on biomarkers measured in the  
137 plasma and urine would be consistent with metabolic effects resulting in compensatory mechanisms  
138 in the kidney, whereas evidence of contrasting effects in the plasma and urine would suggest a  
139 process specific to the kidney underlying the effects.

140 Secondary Mendelian randomization analyses were performed to explore the human genetic  
141 evidence for effects of SLC13A5 inhibition on biomarkers of glucose and lipid metabolism, and  
142 inflammation, namely plasma low-density lipoprotein cholesterol (LDLc), high-density lipoprotein  
143 cholesterol (HDLc), triglycerides, fasting glucose, interleukin 6 (IL6) and C-reactive protein (CRP).  
144 Finally, given that SLC13A5 is predominantly expressed in the liver and is involved in glucose and lipid  
145 metabolism [10,12,20,25], we also investigated potential effects on liver fat.

146 In order to gain potential insight into mediating mechanisms and pathways implicated in the effects  
147 of SLC13A5 inhibition, we also performed a proteome-wide Mendelian randomization study. Finally,  
148 to investigate potential on-target adverse effects or novel indications, we performed a phenome-  
149 wide association study (PheWAS) [26].

150 To explore whether plasma citrate is a potential mediating mechanism for any associations identified,  
151 and thus could serve as a biomarker of mechanism of action, all analyses that considered genetically  
152 proxied SLC13A5 as the exposure were also repeated for genetically predicted plasma citrate levels,  
153 by selecting instruments from throughout the genome rather than confined to the *SLC13A5* gene  
154 region.

155 A schematic figure depicting the overall study design is presented in Figure 1.

156

### 157 ***Statistical analysis***

#### 158 ***Instrument strength***

159 Instrument strength was estimated by calculating the F-statistic for each SNP using the chi-squared  
160 approximation, which for each variant is the square of the SNP-exposure association estimate  
161 divided by the square of the SNP-exposure association estimate's standard error [27].

162

### 163 *Mendelian randomization*

164 The genome-wide association study summary data sources used for the Mendelian randomization  
165 analyses are presented in Table 1 [28–38]. Participant consent and ethical approval for all data were  
166 obtained in the original studies.

167 The main Mendelian randomization analyses were performed using the random-effects inverse-  
168 variance weighted (IVW) method [39]. This meta-analyses the Wald ratio estimates for each  
169 instrument SNP using a random-effects inverse-variance model. After harmonising SNPs by their  
170 effect alleles, the Wald ratio estimate is calculated by dividing the SNP-exposure association estimate  
171 by the SNP-outcome association estimate. The standard error of the Wald ratio estimate was  
172 calculated using the propagation of error method.

173 Two Mendelian randomization statistical sensitivity analyses were employed, Egger and weighted  
174 median, which make distinct assumptions regarding the inclusion of pleiotropic variants. The Egger  
175 method regresses the SNP-outcome association estimates on the SNP-exposure association  
176 estimates [40]. The slope of the regression provides a Mendelian randomization estimate that is  
177 corrected for pleiotropic associations of the genetic variants and the intercept serves as a test for the  
178 presence of such pleiotropic associations, provided that the magnitudes of these pleiotropic  
179 associations are not correlated to instrument strength. The weighted median method orders the  
180 Wald ratio estimates for all instrument SNPs weighted by their precision, and selects the median  
181 value, with 95% confidence intervals (95% CIs) calculated by bootstrapping [41]. It provides an  
182 accurate Mendelian randomization estimate when more than half the information for the analysis  
183 comes from valid instruments. Heterogeneity in MR estimates derived from individual SNPs can also  
184 signify the presence of potential bias from pleiotropy and was assessed using the Cochran's Q test  
185 [42]. All Mendelian randomization analyses were performed using the "MendelianRandomization"  
186 package for R statistical software [43].

187

### 188 *Phenome-wide association study*

189 PheWAS was performed in the UK Biobank, a prospective cohort study initiated in 2006 that  
190 recruited more than 500,000 participants aged between 40 and 69 years [44]. Participants  
191 contributed phenotypic and genetic data, as well as biological samples, as previously reported [45].  
192 UK Biobank has approval from the North West Multi-centre Research Ethics Committee and all  
193 participants provided appropriate consent.

194 PheWAS statistical analysis was performed by first constructing a weighted genetic risk score for the  
195 exposure using the same instrument SNPs as employed in the Mendelian randomization analysis. For  
196 each individual included in the analysis, the number of plasma citrate-increasing alleles for each  
197 instrument SNP were multiplied by the corresponding genetic association estimate with citrate for  
198 that SNP, before combining by addition. International Classification of Diseases versions 9 and 10  
199 were used to ascertain cases in the UK Biobank Hospital Episode Statistics data, with diagnoses  
200 linked to the phenotype code (phecode) grouping system to facilitate classification of clinically  
201 relevant traits [46]. Logistic regression was performed for each phecode against the standardized

202 genetic risk score for the exposure, adjusting for age, sex, and the first 10 genetic principal  
203 components of genetic ancestry. Only phecodes with 200 or more cases were included in the  
204 analysis, to avoid inclusion of outcomes with low statistical power. PheWAS estimates are reported  
205 per 1-SD higher standardized exposure genetic risk score. PheWAS was conducted using the  
206 “PheWAS” package of R statistical software [47].

207

#### 208 *Statistical significance ascertainment*

209 To account for testing of multiple outcomes in the primary Mendelian randomization analysis of  
210 renal outcomes, the Benjamini–Hochberg false discovery rate (FDR) 5% threshold was used. No  
211 statistical significance threshold was used for the other analyses, which were exploratory in nature.  
212 All presented p-values are uncorrected for multiple testing, unless otherwise stated.

213

#### 214 *Comparison of SLC13A5 inhibition with higher plasma citrate levels by any mechanism*

215 The Mendelian randomization and PheWAS analyses were also performed considering the exposure  
216 of plasma citrate levels, rather than SLC13A5 inhibition. Selection of genetic variants to serve as  
217 instruments and build the weighted genetic risk score for plasma citrate was undertaken using the  
218 same approach as for SLC13A5 inhibition, except that selection of variants was not confined to the  
219 *SLC13A5* gene region.

220

#### 221 *Correlation between plasma and urine metabolome-wide Mendelian randomization results*

222 To measure the correlation between the plasma and urine metabolome-wide Mendelian  
223 randomization z-score results, comparison was restricted to all those metabolites analysed in both  
224 plasma and urine, and associated with genetically proxied SLC13A5 inhibition at FDR  $p < 0.2$  in either  
225 analysis.

226

#### 227 *Availability of code and data*

228 R statistical software was used for all analyses. The statistical code used in this work is available upon  
229 reasonable request to the corresponding author. All genome-wide association study summary data  
230 are publicly available from the sources cited in Table 1. UK Biobank individual participant data are  
231 available upon appropriate application to the UK Biobank study. This work was reported using the  
232 “Strengthening the Reporting of Observational Studies in Epidemiology using Mendelian  
233 Randomization” (STROBE-MR) checklist (Supplementary checklist) [48].

## 234 Results

235 A total of 13 SNPs were identified as instruments for SLC13A5 inhibition (Supplementary Table 1), all  
236 of which had F-statistics > 10, consistent with low risk of weak instrument bias that might affect the  
237 conclusions of Mendelian randomization analyses.

238 The main IVW Mendelian randomization identified positive associations of genetically proxied  
239 SLC13A5 inhibition with plasma calcium levels. Every 1-SD higher genetically proxied plasma citrate  
240 through SLC13A5 inhibition was associated with a 0.132 SD units higher plasma calcium level (95% CI  
241 0.107 to 0.157,  $p=6 \times 10^{-13}$ ).

242 Figure 2 depicts the associations of genetically proxied SLC13A5 inhibition with kidney function  
243 parameters from the main IVW Mendelian randomization analysis. There were statistically significant  
244 associations of genetically proxied SLC13A5 inhibition with higher creatinine and cystatin C based  
245 measures of eGFR (FDR adjusted p values = 0.006 and 0.01 respectively), and lower BUN (FDR  
246 adjusted p value = 0.002). There were no strong associations of genetically proxied SLC13A5  
247 inhibition with uACR (FDR adjusted p value = 0.682), or risk of CKD (FDR adjusted p value = 0.516) or  
248 microalbuminuria (FDR adjusted p value = 0.682).

249 The results of the metabolome-wide Mendelian randomization analysis investigating the effects of  
250 SLC13A5 inhibition on plasma and urine metabolites are presented in Supplementary Tables 2 and 3.  
251 For the 7 metabolites present in both analyses and associated with genetically proxied SLC13A5  
252 inhibition at FDR  $p < 0.2$  in either analysis (citrate, aconitate, acetylspermidine, alpha-  
253 hydroxyisocaproate, propyl 4-hydroxybenzoate sulfate, (2-butoxyethoxy)acetic acid, 8-  
254 methoxykynurenate), the correlation coefficient of their z-scores in the analysis of plasma and urine  
255 was 0.78 ( $p=0.04$ ).

256 The main IVW Mendelian randomization analysis results measuring the association of genetically  
257 proxied SLC13A5 inhibition with parameters of glucose and lipid metabolism, and inflammation are  
258 presented in Figure 3. In this hypothesis-generating analysis, there were no significant associations  
259 after adjusting for multiple testing, but some evidence to support possible associations of SLC13A5  
260 inhibition with lower fasting glucose levels (-0.026 mmol/l per 1-SD higher plasma citrate through  
261 SCL13A5 inhibition, 95% CI -0.047 to 0.004, raw  $p=0.022$ ). Neither proteome-wide Mendelian  
262 randomization (Supplementary Table 4) nor PheWAS (Supplementary Table 5) identified any  
263 significant associations for genetically proxied SLC13A5 inhibition after correcting for multiple  
264 testing.

265 All analyses were also performed considering higher plasma citrate through any mechanism as the  
266 exposure, instead of genetically proxied SLC13A5 inhibition (i.e., SNPs associated with higher plasma  
267 citrate selected as in the analysis for SLC13A5, but not restricted to 200kB within the *SLC13A5* gene).  
268 The SNPs used as instruments for plasma citrate are presented in Supplementary Table 6, and the  
269 analysis results are presented in Supplementary Tables 7-10. Although the main IVW analysis did not  
270 identify evidence supporting associations of genetically predicted plasma citrate levels with eGFR or  
271 BUN, the Egger and weighted median sensitivity analyses that are more robust to the inclusion of  
272 pleiotropic SNPs were more supportive of such an association (Supplementary Table 11). This  
273 suggests that the genetic variants that affect plasma citrate are heterogeneous in the mechanisms by  
274 which they achieve this, and consistent with this, there was strong evidence of heterogeneity in all  
275 the IVW MR analyses undertaken with plasma citrate as the exposure (Supplementary Table 11).



## 276 Discussion

277 Using large-scale genetic association data, we identified a genetic instrument for SLC13A5 inhibition  
278 that we leveraged in the Mendelian randomization paradigm to provide clinically translatable  
279 insights. Our main findings generated human genetic evidence that supports higher plasma citrate  
280 and calcium as biologically plausible biomarkers of target engagement, higher plasma citrate as a  
281 potential mechanism of action, and favourable effects on parameters of kidney function, namely  
282 creatinine and cystatin C based measures of eGFR, and BUN. Of note, we did not identify statistically  
283 significant evidence of effects of SLC13A5 inhibition on uACR nor risk of microalbuminuria. This  
284 discrepancy may be explained by these biomarkers measuring different domains of kidney function  
285 [49]. Of relevance, calcium citrate treatment in an acute kidney damage animal model resulted in  
286 significantly reduced levels of proteinuria [1]. The primary Mendelian randomization analysis also did  
287 not identify evidence of SLC13A5 inhibition having effects on CKD risk, which may in part be  
288 explained by the pathophysiological heterogeneity underlying CKD [50], and SLC13A5 inhibition  
289 potentially only being relevant to some of these mechanisms.

290 The correlation between the associations of genetically proxied SLC13A5 with the plasma and urine  
291 metabolomes is consistent with effects of SLC13A5 on the urine being downstream to effects on the  
292 plasma, and the kidney compensating plasma changes through altered renal excretion. This would  
293 also support that effects of SLC13A5 inhibition on kidney function may be occurring through  
294 metabolic effects originating outside the kidney. Secondary Mendelian randomization analyses  
295 supported potential effects of SLC13A5 inhibition on reducing fasting glucose. Given that SLC13A5 is  
296 predominantly expressed in the liver [25], these findings are consistent with direct hepatic effects.  
297 The lack of strong associations of genetically proxied SLC13A5 inhibition with clinical outcomes in  
298 PheWAS is reassuring regarding safety profile. This suggests smaller reductions in SLC13A5 activity  
299 are unlikely to recapitulate the autosomal-recessive epileptic encephalopathy phenotype observed  
300 with rare mutations affecting critical regions of the *SLC13A5* gene [51].

301 SLC13A5 is a membrane-bound citrate transporter, and its inhibition results in reduced entry of  
302 plasma citrate into the cytosol [4,5]. This would be expected to have implications for cellular  
303 metabolism in cells expressing SLC13A5, with the higher circulating plasma citrate levels also  
304 potentially impacting metabolism systemically. Consistent with the results of our main genetic  
305 analyses, previous work has identified protective effects of citrate in various animal models of kidney  
306 disease [1,6,52,53]. Although the main IVW Mendelian randomization analysis investigating effects  
307 of plasma citrate levels did not identify evidence supporting effects on parameters of kidney  
308 function, there was strong evidence of heterogeneity in estimates generated by individual SNPs,  
309 consistent with the presence of pleiotropic effects that could bias the main IVW analyses [42].  
310 Furthermore, the Egger and weighted median Mendelian randomization statistical sensitivity  
311 analyses, which can be more robust to the inclusion of pleiotropic variants, produced estimates more  
312 suggestive of favourable effects of higher plasma citrate on measures of kidney function. This  
313 observation may suggest that plasma citrate is a heterogeneous trait that is affected through several  
314 distinct pathways, and that at least some of these may favourably impact kidney function. This would  
315 be in-keeping with the favourable effects of SLC13A5 on kidney function occurring through its effects  
316 on plasma citrate. It has been reported that low citrate levels in urine are associated with various  
317 forms of kidney disease, and low urinary citrate is a biomarker for kidney disease progression [52,54–  
318 59]. Furthermore, preclinical studies with SLC13A5 knockout mice have supported effects on  
319 sympathoadrenal mechanisms [60], which may also contribute to nephroprotective effects of  
320 genetically proxied SLC13A5 inhibition.

321 There are several hypotheses for how citrate may exert its beneficial effects on kidney function.  
322 Generally, elevated plasma citrate levels are proposed to lead to increased excretion of citrate  
323 through the urine. Higher urinary citrate may in turn provide an additional energy supply for kidney  
324 cells, potentially enhancing their resilience and function. Furthermore, citrate may contribute to  
325 supporting the biosynthesis of essential molecules such as glucose, lipids, and amino acids.  
326 Additionally, it is known, due to its alkalinizing function citrate contributes to improved acid-base  
327 balance within the kidneys, promoting a favourable environment for cellular processes. Finally,  
328 urinary citrate's solubilizing properties might offer protection against vascular calcification and the  
329 formation of kidney stones, thus safeguarding kidney health.

330 This work has several strengths. By leveraging large-scale genetic association data within the  
331 Mendelian randomization paradigm, we were able to rapidly perform several hypothesis-driven and  
332 hypothesis-free genetic analyses relevant to humans, and consequently generate insight related to  
333 drug development. Our findings represent numerous potential learnings, including highlighting  
334 higher plasma citrate and calcium as a biomarker of target engagement, higher plasma citrate as a  
335 biomarker of mechanism of action, efficacy for reducing progression of kidney disease, general safety  
336 profile, and potential effects on reducing fasting glucose. Further, the random allocation of genetic  
337 variants at conception means that these findings are less vulnerable to the confounding and reverse  
338 causation bias that can hinder causal inference in traditional epidemiological study designs [61].

339 This work should also be interpreted in the context of its limitations. The Mendelian randomization  
340 paradigm considers small lifelong effects of germline genetic variation. This is not the same as a  
341 discrete clinical intervention in later life, which may be of shorter duration but larger magnitude.  
342 Thus, it is possible that some of the findings of these genetic analyses may not predict what is  
343 observed with inhibition of SLC13A5 in clinical practice, particularly in quantitative terms. Further,  
344 some of our current analyses may also be limited by phenotypic definition and statistical power.  
345 While challenges in estimating the variance of drug target perturbation predicted by genetic variants  
346 means that it is not possible to perform conventional power calculations for drug target Mendelian  
347 randomization [62], some indication of the relative statistical power available for each analysis is  
348 apparent from the size of the 95% CIs. From this, it is clear that the analyses considering CKD had  
349 much less power than those considering measures of eGFR or BUN, for example. Of relevance,  
350 numerous preclinical mechanistic studies have demonstrated a role of SLC13A5 in favourably  
351 affecting hepatic lipid and glucose metabolism [10–13,20,21,63,64], and the limitations of our  
352 current analyses may explain the discrepancy in findings. The plasma and urine metabolome-wide  
353 Mendelian randomization analyses were undertaken using outcome data obtained from a CKD  
354 population and may thus be vulnerable to collider bias [65]. This is because stratifying on a collider  
355 can introduce associations with confounding factors. Our Mendelian randomization evidence  
356 supports effects of SLC13A5 inhibition on parameters of kidney function, in-keeping with CKD  
357 therefore representing a potential collider. While there are strategies available to help explore  
358 potential bias from this [66], they either require individual participant data, which were not available  
359 for the current Mendelian randomization analyses, or have other prohibitive limitations [67]. Finally,  
360 the genetic analyses undertaken in this work provide insight into the on-target effects of perturbing  
361 SLC13A5 [19], but cannot directly inform on the effects of any pharmacological agents used to inhibit  
362 SLC13A5, including their pharmacokinetic and pharmacodynamic properties, or off-target effects.

363 In summary, this Mendelian randomization analysis provides novel human-centric insight to guide  
364 the clinical development of an SLC13A5 inhibitor. We identify biologically plausible biomarkers of  
365 target engagement and mode of action, as well as genetic evidence supporting potential effects in  
366 improving kidney function, with higher plasma citrate levels a possible underlying mechanism. The

367 null PheWAS findings are reassuring in that they do not identify any safety signals. Further study in  
368 the form of early-stage clinical trials may now be warranted to help translate these findings towards  
369 improving patient care.

## 370 References

- 371 [1] Gadola L, Noboa O, Marquez MN, Rodriguez MJ, Nin N, Boggia J, et al. Calcium citrate  
372 ameliorates the progression of chronic renal injury. *Kidney Int* 2004;65.  
373 <https://doi.org/10.1111/j.1523-1755.2004.00496.x>.
- 374 [2] Weinberg JM, Venkatachalam MA, Roeser NF, Saikumar P, Dong Z, Senter RA, et al. Anaerobic  
375 and aerobic pathways for salvage of proximal tubules from hypoxia-induced mitochondrial  
376 injury. *Am J Physiol Renal Physiol* 2000;279.  
377 <https://doi.org/10.1152/ajprenal.2000.279.5.f927>.
- 378 [3] Feldkamp T, Kribben A, Roeser NF, Senter RA, Weinberg JM. Accumulation of nonesterified  
379 fatty acids causes the sustained energetic deficit in kidney proximal tubules after hypoxia-  
380 reoxygenation. *Am J Physiol Renal Physiol* 2006;290.  
381 <https://doi.org/10.1152/ajprenal.00305.2005>.
- 382 [4] Zhang L, Hu W, Qiu Z, Li Z, Bian J. Opportunities and Challenges for Inhibitors Targeting Citrate  
383 Transport and Metabolism in Drug Discovery. *J Med Chem* 2023.  
384 <https://doi.org/10.1021/acs.jmedchem.3c00179>.
- 385 [5] Inoue K, Zhuang L, Maddox DM, Smith SB, Ganapathy V. Human sodium-coupled citrate  
386 transporter, the orthologue of *Drosophila* Indy, as a novel target for lithium action.  
387 *Biochemical Journal* 2003;374. <https://doi.org/10.1042/BJ20030827>.
- 388 [6] Bienholz A, Reis J, Sanli P, De Groot H, Petrat F, Guberina H, et al. Citrate shows protective  
389 effects on cardiovascular and renal function in ischemia-induced acute kidney injury. *BMC*  
390 *Nephrol* 2017;18. <https://doi.org/10.1186/s12882-017-0546-1>.
- 391 [7] Akhtar MJ, Khan SA, Kumar B, Chawla P, Bhatia R, Singh K. Role of sodium dependent SLC13  
392 transporter inhibitors in various metabolic disorders. *Mol Cell Biochem* 2023;478.  
393 <https://doi.org/10.1007/s11010-022-04618-7>.
- 394 [8] Willmes DM, Kurzbach A, Henke C, Schumann T, Zahn G, Heifetz A, et al. The longevity gene  
395 INDY (I'm Not Dead Yet) in metabolic control: Potential as pharmacological target. *Pharmacol*  
396 *Ther* 2018;185. <https://doi.org/10.1016/j.pharmthera.2017.10.003>.
- 397 [9] Schumann T, König J, Henke C, Willmes DM, Bornstein SR, Jordan J, et al. Solute carrier  
398 transporters as potential targets for the treatment of metabolic disease. *Pharmacol Rev*  
399 2020;72. <https://doi.org/10.1124/pr.118.015735>.
- 400 [10] Birkenfeld AL, Lee HY, Guebre-Egziabher F, Alves TC, Jurczak MJ, Jornayvaz FR, et al. Deletion  
401 of the mammalian INDY homolog mimics aspects of dietary restriction and protects against  
402 adiposity and insulin resistance in mice. *Cell Metab* 2011;14.  
403 <https://doi.org/10.1016/j.cmet.2011.06.009>.
- 404 [11] von Loeffelholz C, Lieske S, Neuschäfer-Rube F, Willmes DM, Raschzok N, Sauer IM, et al. The  
405 human longevity gene homolog INDY and interleukin-6 interact in hepatic lipid metabolism.  
406 *Hepatology* 2017;66. <https://doi.org/10.1002/hep.29089>.
- 407 [12] Zahn G, Willmes DM, El-Agroudy NN, Yarnold C, Jarjes-Pike R, Schaertl S, et al. A Novel and  
408 Cross-Species Active Mammalian INDY (NaCT) Inhibitor Ameliorates Hepatic Steatosis in Mice  
409 with Diet-Induced Obesity. *Metabolites* 2022;12. <https://doi.org/10.3390/metabo12080732>.

- 410 [13] Huard K, Brown J, Jones JC, Cabral S, Futatsugi K, Gorgoglione M, et al. Discovery and  
411 characterization of novel inhibitors of the sodium-coupled citrate transporter (NaCT or  
412 SLC13A5). *Sci Rep* 2015;5. <https://doi.org/10.1038/srep17391>.
- 413 [14] Kopel JJ, Bhutia YD, Sivaprakasam S, Ganapathy V. Consequences of NaCT/SLC13A5/mINDY  
414 deficiency: Good versus evil, separated only by the blood-brain barrier. *Biochemical Journal*  
415 2021;478. <https://doi.org/10.1042/BCJ20200877>.
- 416 [15] Gopal E, Babu E, Ramachandran S, Bhutia YD, Prasad PD, Ganapathy V. Species-specific  
417 influence of lithium on the activity of SLC13A5 (NACT): Lithium-induced activation is specific  
418 for the transporter in primates. *Journal of Pharmacology and Experimental Therapeutics*  
419 2015;353. <https://doi.org/10.1124/jpet.114.221523>.
- 420 [16] Inoue K, Zhuang L, Ganapathy V. Human Na<sup>+</sup>-coupled citrate transporter: Primary structure,  
421 genomic organization, and transport function. *Biochem Biophys Res Commun* 2002;299.  
422 [https://doi.org/10.1016/S0006-291X\(02\)02669-4](https://doi.org/10.1016/S0006-291X(02)02669-4).
- 423 [17] Hingorani AD, Kuan V, Finan C, Kruger FA, Gaulton A, Chopade S, et al. Improving the odds of  
424 drug development success through human genomics: modelling study. *Sci Rep* 2019;9.  
425 <https://doi.org/10.1038/s41598-019-54849-w>.
- 426 [18] Gill D, Georgakis MK, Walker VM, Schmidt AF, Gkatzionis A, Freitag DF, et al. Mendelian  
427 randomization for studying the effects of perturbing drug targets. *Wellcome Open Res* 2021;6.  
428 <https://doi.org/10.12688/wellcomeopenres.16544.2>.
- 429 [19] Burgess S, Mason AM, Grant AJ, Slob EAW, Gkatzionis A, Zuber V, et al. Using genetic  
430 association data to guide drug discovery and development: Review of methods and  
431 applications. *Am J Hum Genet* 2023;110. <https://doi.org/10.1016/j.ajhg.2022.12.017>.
- 432 [20] Pesta DH, Perry RJ, Guebre-Egziabher F, Zhang D, Jurczak M, Fischer-Rosinsky A, et al.  
433 Prevention of diet-induced hepatic steatosis and hepatic insulin resistance by second  
434 generation antisense oligonucleotides targeted to the longevity gene mIndy (Slc13a5). *Aging*  
435 2015;7. <https://doi.org/10.18632/aging.100854>.
- 436 [21] Brachs S, Winkel AF, Tang H, Birkenfeld AL, Brunner B, Jahn-Hofmann K, et al. Inhibition of  
437 citrate cotransporter Slc13a5/mINDY by RNAi improves hepatic insulin sensitivity and  
438 prevents diet-induced non-alcoholic fatty liver disease in mice. *Mol Metab* 2016;5.  
439 <https://doi.org/10.1016/j.molmet.2016.08.004>.
- 440 [22] Brown TL, Nye KL, Porter BE. Growth and overall health of patients with slc13a5 citrate  
441 transporter disorder. *Metabolites* 2021;11. <https://doi.org/10.3390/metabo11110746>.
- 442 [23] Bainbridge MN, Cooney E, Miller M, Kennedy AD, Wulff JE, Donti T, et al. Analyses of SLC13A5-  
443 epilepsy patients reveal perturbations of TCA cycle. *Mol Genet Metab* 2017;121.  
444 <https://doi.org/10.1016/j.ymgme.2017.06.009>.
- 445 [24] Dirckx N, Zhang Q, Chu EY, Tower RJ, Li Z, Guo S, et al. A specialized metabolic pathway  
446 partitions citrate in hydroxyapatite to impact mineralization of bones and teeth. *Proc Natl*  
447 *Acad Sci U S A* 2022;119. <https://doi.org/10.1073/pnas.2212178119>.
- 448 [25] Li Z, Wang H. Molecular mechanisms of the SLC13A5 gene transcription. *Metabolites* 2021;11.  
449 <https://doi.org/10.3390/metabo11100706>.

- 450 [26] Denny JC, Ritchie MD, Basford MA, Pulley JM, Bastarache L, Brown-Gentry K, et al. PheWAS:  
451 Demonstrating the feasibility of a phenome-wide scan to discover gene-disease associations.  
452 *Bioinformatics* 2010;26. <https://doi.org/10.1093/bioinformatics/btq126>.
- 453 [27] Li B, Martin EB. An approximation to the F distribution using the chi-square distribution.  
454 *Comput Stat Data Anal* 2002;40. [https://doi.org/10.1016/S0167-9473\(01\)00097-4](https://doi.org/10.1016/S0167-9473(01)00097-4).
- 455 [28] Elsworth B, Lyon M, Alexander T, Liu Y, Matthews P, Hallett J, et al. The MRC IEU OpenGWAS  
456 data infrastructure. *BioRxiv* 2020.
- 457 [29] Neale Lab. GWAS of UK Biobank biomarker measurements 2023.
- 458 [30] Stanzick KJ, Li Y, Schlosser P, Gorski M, Wuttke M, Thomas LF, et al. Discovery and  
459 prioritization of variants and genes for kidney function in >1.2 million individuals. *Nat*  
460 *Commun* 2021;12. <https://doi.org/10.1038/s41467-021-24491-0>.
- 461 [31] Teumer A, Li Y, Ghasemi S, Prins BP, Wuttke M, Hermle T, et al. Genome-wide association  
462 meta-analyses and fine-mapping elucidate pathways influencing albuminuria. *Nat Commun*  
463 2019;10. <https://doi.org/10.1038/s41467-019-11576-0>.
- 464 [32] Wuttke M, Li Y, Li M, Sieber KB, Feitosa MF, Gorski M, et al. A catalog of genetic loci associated  
465 with kidney function from analyses of a million individuals. *Nat Genet* 2019;51.  
466 <https://doi.org/10.1038/s41588-019-0407-x>.
- 467 [33] Schlosser P, Scherer N, Grundner-Culemann F, Monteiro-Martins S, Haug S, Steinbrenner I, et  
468 al. Genetic studies of paired metabolomes reveal enzymatic and transport processes at the  
469 interface of plasma and urine. *Nat Genet* 2023;55. [https://doi.org/10.1038/s41588-023-](https://doi.org/10.1038/s41588-023-01409-8)  
470 [01409-8](https://doi.org/10.1038/s41588-023-01409-8).
- 471 [34] Graham SE, Clarke SL, Wu KHH, Kanoni S, Zajac GJM, Ramdas S, et al. The power of genetic  
472 diversity in genome-wide association studies of lipids. *Nature* 2021;600.  
473 <https://doi.org/10.1038/s41586-021-04064-3>.
- 474 [35] Chen J, Spracklen CN, Marenne G, Varshney A, Corbin LJ, Luan J, et al. The trans-ancestral  
475 genomic architecture of glycemc traits. *Nat Genet* 2021;53. [https://doi.org/10.1038/s41588-](https://doi.org/10.1038/s41588-021-00852-9)  
476 [021-00852-9](https://doi.org/10.1038/s41588-021-00852-9).
- 477 [36] Haas ME, Pirruccello JP, Friedman SN, Wang M, Emdin CA, Ajmera VH, et al. Machine learning  
478 enables new insights into genetic contributions to liver fat accumulation. *Cell Genomics*  
479 2021;1. <https://doi.org/10.1016/j.xgen.2021.100066>.
- 480 [37] Ferkingstad E, Sulem P, Atlason BA, Sveinbjornsson G, Magnusson MI, Styrnisdottir EL, et al.  
481 Large-scale integration of the plasma proteome with genetics and disease. *Nat Genet*  
482 2021;53. <https://doi.org/10.1038/s41588-021-00978-w>.
- 483 [38] Said S, Pazoki R, Karhunen V, Vösa U, Ligthart S, Bodinier B, et al. Genetic analysis of over half  
484 a million people characterises C-reactive protein loci. *Nat Commun* 2022;13.  
485 <https://doi.org/10.1038/s41467-022-29650-5>.
- 486 [39] Burgess S, Butterworth A, Thompson SG. Mendelian randomization analysis with multiple  
487 genetic variants using summarized data. *Genet Epidemiol* 2013;37:658–65.  
488 <https://doi.org/10.1002/gepi.21758>.

- 489 [40] Bowden J, Davey Smith G, Burgess S. Mendelian randomization with invalid instruments:  
490 effect estimation and bias detection through Egger regression. *Int J Epidemiol* 2015;44:512–  
491 25. <https://doi.org/10.1093/ije/dyv080>.
- 492 [41] Bowden J, Davey Smith G, Haycock PC, Burgess S. Consistent Estimation in Mendelian  
493 Randomization with Some Invalid Instruments Using a Weighted Median Estimator. *Genet  
494 Epidemiol* 2016;40:304–14. <https://doi.org/10.1002/gepi.21965>.
- 495 [42] Greco M F Del, Minelli C, Sheehan NA, Thompson JR. Detecting pleiotropy in Mendelian  
496 randomisation studies with summary data and a continuous outcome. *Stat Med* 2015;34.  
497 <https://doi.org/10.1002/sim.6522>.
- 498 [43] Yavorska OO, Burgess S. MendelianRandomization: An R package for performing Mendelian  
499 randomization analyses using summarized data. *Int J Epidemiol* 2017;46.  
500 <https://doi.org/10.1093/ije/dyx034>.
- 501 [44] Sudlow C, Gallacher J, Allen N, Beral V, Burton P, Danesh J, et al. UK Biobank: An Open Access  
502 Resource for Identifying the Causes of a Wide Range of Complex Diseases of Middle and Old  
503 Age. *PLoS Med* 2015;12. <https://doi.org/10.1371/journal.pmed.1001779>.
- 504 [45] Bycroft C, Freeman C, Petkova D, Band G, Elliott LT, Sharp K, et al. The UK Biobank resource  
505 with deep phenotyping and genomic data. *Nature* 2018;562. [https://doi.org/10.1038/s41586-  
506 018-0579-z](https://doi.org/10.1038/s41586-018-0579-z).
- 507 [46] Wu P, Gifford A, Meng X, Li X, Campbell H, Varley T, et al. Mapping ICD-10 and ICD-10-CM  
508 Codes to phecodes: Workflow development and initial evaluation. *JMIR Med Inform* 2019;7.  
509 <https://doi.org/10.2196/14325>.
- 510 [47] Carroll RJ, Bastarache L, Denny JC. R PheWAS: Data analysis and plotting tools for phenome-  
511 wide association studies in the R environment. *Bioinformatics* 2014;30.  
512 <https://doi.org/10.1093/bioinformatics/btu197>.
- 513 [48] Skrivankova VW, Richmond RC, Woolf BAR, Yarmolinsky J, Davies NM, Swanson SA, et al.  
514 Strengthening the Reporting of Observational Studies in Epidemiology Using Mendelian  
515 Randomization: The STROBE-MR Statement. *JAMA - Journal of the American Medical  
516 Association* 2021;326. <https://doi.org/10.1001/jama.2021.18236>.
- 517 [49] Lopez-Giacoman S. Biomarkers in chronic kidney disease, from kidney function to kidney  
518 damage. *World J Nephrol* 2015;4. <https://doi.org/10.5527/wjn.v4.i1.57>.
- 519 [50] Matovinović MS. 1. Pathophysiology and Classification of Kidney Diseases. *EJIFCC* 2009;20.
- 520 [51] Thevenon J, Milh M, Feillet F, St-Onge J, Duffourd Y, Jugé C, et al. Mutations in SLC13A5 cause  
521 autosomal-recessive epileptic encephalopathy with seizure onset in the first days of Life. *Am J  
522 Hum Genet* 2014;95. <https://doi.org/10.1016/j.ajhg.2014.06.006>.
- 523 [52] Rocha DR, Xue L, Gomes Sousa HM, Carvalho Matos AC, Hoorn EJ, Salih M, et al. Urinary  
524 Citrate Is Associated with Kidney Outcomes in Early Polycystic Kidney Disease. *Kidney360*  
525 2022;3. <https://doi.org/10.34067/KID.0004772022>.
- 526 [53] Tanner GA, Tanner JA. Citrate therapy for polycystic kidney disease in rats. *Kidney Int* 2000;58.  
527 <https://doi.org/10.1111/j.1523-1755.2000.00357.x>.

- 528 [54] Posada-Ayala M, Zubiri I, Martin-Lorenzo M, Sanz-Maroto A, Molero D, Gonzalez-Calero L, et  
529 al. Identification of a urine metabolomic signature in patients with advanced-stage chronic  
530 kidney disease. *Kidney Int* 2014;85. <https://doi.org/10.1038/ki.2013.328>.
- 531 [55] Hallan S, Afkarian M, Zelnick LR, Kestenbaum B, Sharma S, Saito R, et al. Metabolomics and  
532 Gene Expression Analysis Reveal Down-regulation of the Citric Acid (TCA) Cycle in Non-  
533 diabetic CKD Patients. *EBioMedicine* 2017;26. <https://doi.org/10.1016/j.ebiom.2017.10.027>.
- 534 [56] Liu JJ, Liu S, Gurung RL, Ching J, Kovalik JP, Tan TY, et al. Urine tricarboxylic acid cycle  
535 metabolites predict progressive chronic kidney disease in type 2 diabetes. *Journal of Clinical  
536 Endocrinology and Metabolism* 2018;103. <https://doi.org/10.1210/jc.2018-00947>.
- 537 [57] Goraya N, Simoni J, Sager LN, Mamun A, Madias NE, Wesson DE. Urine citrate excretion  
538 identifies changes in acid retention as eGFR declines in patients with chronic kidney disease.  
539 *Am J Physiol Renal Physiol* 2019;317. <https://doi.org/10.1152/ajprenal.00044.2019>.
- 540 [58] Mutter S, Valo E, Aittomäki V, Nybo K, Raivonen L, Thorn LM, et al. Urinary metabolite  
541 profiling and risk of progression of diabetic nephropathy in 2670 individuals with type 1  
542 diabetes. *Diabetologia* 2022;65. <https://doi.org/10.1007/s00125-021-05584-3>.
- 543 [59] Domrongkitchaiporn S, Stitchantrakul W, Kochakarn W. Causes of Hypocitraturia in Recurrent  
544 Calcium Stone Formers: Focusing on Urinary Potassium Excretion. *American Journal of Kidney  
545 Diseases* 2006;48. <https://doi.org/10.1053/j.ajkd.2006.06.008>.
- 546 [60] Willmes DM, Daniels M, Kurzbach A, Lieske S, Bechmann N, Schumann T, et al. The longevity  
547 gene mIndy (I'm Not Dead, Yet) affects blood pressure through sympathoadrenal  
548 mechanisms. *JCI Insight* 2021;6. <https://doi.org/10.1172/jci.insight.136083>.
- 549 [61] Burgess S, Butterworth A, Malarstig A, Thompson SG. Use of Mendelian randomisation to  
550 assess potential benefit of clinical intervention. *BMJ* 2012;345.  
551 <https://doi.org/10.1136/bmj.e7325>.
- 552 [62] Burgess S. Sample size and power calculations in Mendelian randomization with a single  
553 instrumental variable and a binary outcome. *Int J Epidemiol* 2014;43.  
554 <https://doi.org/10.1093/ije/dyu005>.
- 555 [63] Neuschäfer-Rube F, Schraplau A, Schewe B, Lieske S, Krützfeldt JM, Ringel S, et al.  
556 Arylhydrocarbon receptor-dependent mIndy (Slc13a5) induction as possible contributor to  
557 benzo[a]pyrene-induced lipid accumulation in hepatocytes. *Toxicology* 2015;337.  
558 <https://doi.org/10.1016/j.tox.2015.08.007>.
- 559 [64] Li L, Li H, Garzel B, Yang H, Sueyoshi T, Li Q, et al. SLC13A5 Is a novel transcriptional target of  
560 the pregnane x receptor and sensitizes drug-induced steatosis in human liver. *Mol Pharmacol*  
561 2015;87. <https://doi.org/10.1124/mol.114.097287>.
- 562 [65] Paternoster L, Tilling K, Davey Smith G. Genetic epidemiology and Mendelian randomization  
563 for informing disease therapeutics: Conceptual and methodological challenges. *PLoS Genet*  
564 2017;13. <https://doi.org/10.1371/journal.pgen.1006944>.
- 565 [66] Mitchell RE, Hartley AE, Walker VM, Gkatzionis A, Yarmolinsky J, Bell JA, et al. Strategies to  
566 investigate and mitigate collider bias in genetic and Mendelian randomisation studies of  
567 disease progression. *PLoS Genet* 2023;19. <https://doi.org/10.1371/journal.pgen.1010596>.



568 [67] Cai S, Allen RJ, Wain LV, Dudbridge F. Reassessing the association of MUC5B with survival in  
569 idiopathic pulmonary fibrosis. *Ann Hum Genet* 2023;87:248–53.  
570 <https://doi.org/https://doi.org/10.1111/ahg.12522>.

571

572 **Acknowledgements**

573 ***Funding***

574 This work was supported by Eternygen GmbH. Dipender Gill acknowledges support by the British  
575 Heart Foundation Centre of Research Excellence at Imperial College London (RE/18/4/34215).  
576 Stephen Burgess is supported by the Wellcome Trust (225790/Z/22/Z) and the United Kingdom  
577 Research and Innovation Medical Research Council (MC\_UU\_00002/7).

578

579 ***Conflicts of interest***

580 Dipender Gill and Rubinder Gill are employed part-time by Primula Group. Stephen Burgess has  
581 received personal fees from Primula Group. Andreas Birkenfeld and Jens Jordan are minor  
582 shareholders of Eternygen GmbH, and Grit Zahn is minor shareholder and employee of Eternygen  
583 GmbH. Andreas Birkenfeld has received research funding from Boehringer Ingelheim und  
584 AstraZeneca.

585 **Table and Figure**

586 Table 1. Genome-wide association study summary data used for the Mendelian randomization  
587 analyses.

| Category                               | Trait                                       | Unit      | Population                                | Sample size            | Citation |
|----------------------------------------|---------------------------------------------|-----------|-------------------------------------------|------------------------|----------|
| <b>Biomarker</b>                       | Plasma citrate                              | SD        | European ancestry UK Biobank participants | 115,064                | [28]     |
|                                        | Plasma calcium                              | SD        | British ancestry UK Biobank participants  | 361,194                | [29]     |
| <b>Renal</b>                           | Creatinine-eGFR                             | SD of log | Multi-ancestry GWAS meta-analysis         | 1,201,929              | [30]     |
|                                        | Cystatin C-eGFR                             | SD of log |                                           |                        |          |
|                                        | Blood urea nitrogen                         | SD of log |                                           |                        |          |
|                                        | Urine albumin-creatinine ratio              | SD of log | Multi-ancestry GWAS meta-analysis         | 564,257                | [31]     |
|                                        | Chronic kidney disease                      | Log OR    | Multi-ancestry GWAS meta-analysis         | 625,219 (64,164 cases) | [32]     |
|                                        | Microalbuminuria                            | Log OR    | Multi-ancestry GWAS meta-analysis         | 348,954 (51,861 cases) | [31]     |
| <b>Metabolome</b>                      | 1,296 plasma metabolites                    | SD        | German Chronic Kidney Disease study       | 5,023                  | [33]     |
|                                        | 1,399 urine metabolites                     | SD        |                                           |                        |          |
| <b>Lipid, glucose and inflammation</b> | Plasma low-density lipoprotein cholesterol  | SD        | European ancestry GWAS meta-analysis      | 1,320,016              | [34]     |
|                                        | Plasma high-density lipoprotein cholesterol | SD        |                                           |                        |          |
|                                        | Plasma triglycerides                        | SD        |                                           |                        |          |
|                                        | Fasting plasma glucose                      | mmol/l    | European ancestry GWAS meta-analysis      | 200,622                | [35]     |
|                                        | Imaging-derived liver fat (MRI-PDFF)        | SD        | UK Biobank participants                   | 36,703                 | [36]     |
|                                        | Plasma interleukin 6 binding aptamer level  | SD        | deCODE Icelandic study                    | 35,559                 | [37]     |
|                                        | Plasma C-reactive protein level             | SD of log | European ancestry GWAS                    | 427,367                | [38]     |
| <b>Proteome</b>                        | 4,907 plasma protein-binding aptamers       | SD        | deCODE Icelandic study                    | 35,559                 | [37]     |

588 The full list of analysed metabolites and protein-binding aptamers are available in the Supplementary files. Full  
589 study details and access to GWAS summary data are provided in the original publications. BUN: blood urea  
590 nitrogen; eGFR: estimated glomerular filtration rate; GWAS: genome-wide association study; MRI-PDFF:  
591 magnetic resonance imaging derived proton density fat fraction; OR: odds ratio; SD: standard deviation; uACR:  
592 urine albumin-creatinine ratio.

593 Figure 1. Overview of the study design.

|                      |                                                                                                                                                                                                                                                                                                                                                                                                                                                                                                                                                                           |                                                                                                                                                                                                                                                        |                                                            |
|----------------------|---------------------------------------------------------------------------------------------------------------------------------------------------------------------------------------------------------------------------------------------------------------------------------------------------------------------------------------------------------------------------------------------------------------------------------------------------------------------------------------------------------------------------------------------------------------------------|--------------------------------------------------------------------------------------------------------------------------------------------------------------------------------------------------------------------------------------------------------|------------------------------------------------------------|
|                      | <b>SLC13A5 inhibition</b><br>Identify genetic instruments for SLC13A5 inhibition<br><small>SNPs within 200kb of the SLC13A5 gene, uncorrelated (<math>r^2 &lt; 0.1</math>) and associated with plasma citrate at <math>p &lt; 5 \times 10^{-8}</math></small>                                                                                                                                                                                                                                                                                                             | <b>Higher plasma citrate</b><br>Identify genetic instruments for plasma citrate<br><small>SNPs from throughout the genome, uncorrelated (<math>r^2 &lt; 0.1</math>) and associated with plasma citrate at <math>p &lt; 5 \times 10^{-8}</math></small> | <b>Mendelian randomization sensitivity analyses</b>        |
|                      | Confirm instrument validity by performing Mendelian randomization to investigate effects on plasma calcium                                                                                                                                                                                                                                                                                                                                                                                                                                                                |                                                                                                                                                                                                                                                        |                                                            |
| Primary analysis     | Hypothesis-driven Mendelian randomization analysis investigating effects on parameters of renal function<br><small>Creatinine-eGFR, cystatin C-eGFR, BUN, uACR, risk of CKD and microalbuminuria</small>                                                                                                                                                                                                                                                                                                                                                                  |                                                                                                                                                                                                                                                        |                                                            |
| Exploratory analyses | Exploratory Mendelian randomization analyses investigating effects of SLC13A5 inhibition on: <ol style="list-style-type: none"> <li>1. Plasma and urine metabolites<br/><small>1,296 plasma metabolites and 1,399 urine metabolites</small></li> <li>2. Biomarkers of glucose and lipid metabolism, and inflammation<br/><small>Glucose, HDLc, LDLc and triglycerides, liver fat, IL6, CRP</small></li> <li>3. Plasma proteins<br/><small>4,907 plasma protein-binding aptamers</small></li> </ol> Phenome-wide association study<br><small>988 clinical outcomes</small> | Repeat all analyses, but considering plasma citrate as the exposure, instead of SLC13A5 inhibition                                                                                                                                                     | Egger and weighted median statistical sensitivity analyses |

594

595 BUN: blood urea nitrogen, CRP:C-reactive protein, CKD: chronic kidney disease; eGFR: estimated glomerular  
 596 filtration rate, HDLc: high-density lipoprotein cholesterol, IL6: interleukin 6; LDLc: low-density lipoprotein  
 597 cholesterol, SNP: single-nucleotide polymorphism, uACR: urine albumin-creatinine ratio.

598 Figure 2. Mendelian randomization estimates for the association of genetically proxied SLC13A5  
599 inhibition with kidney traits.

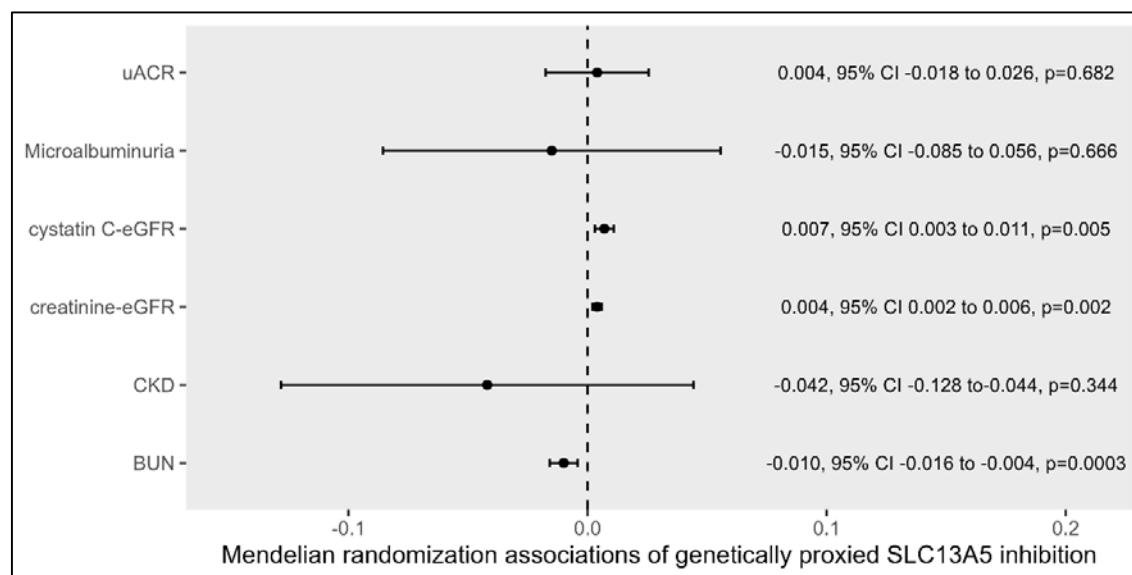

600

601 Mendelian randomization estimates are scaled per 1-standard deviation (SD) increase in plasma citrate through  
602 genetically proxied SLC13A5 inhibition. The units for the BUN, creatinine-eGFR, cystatin C-eGFR and uACR are  
603 SD change in log transformed levels. The units for CKD and microalbuminuria are log odds ratio. Raw p values  
604 are presented. BUN: blood urea nitrogen, chronic kidney disease; eGFR: estimated glomerular filtration rate,  
605 urine albumin-creatinine ratio.

606 Figure 3. Mendelian randomization estimates for the association of genetically proxied SLC13A5  
607 inhibition with biomarkers of glucose and lipid metabolism, and inflammation.

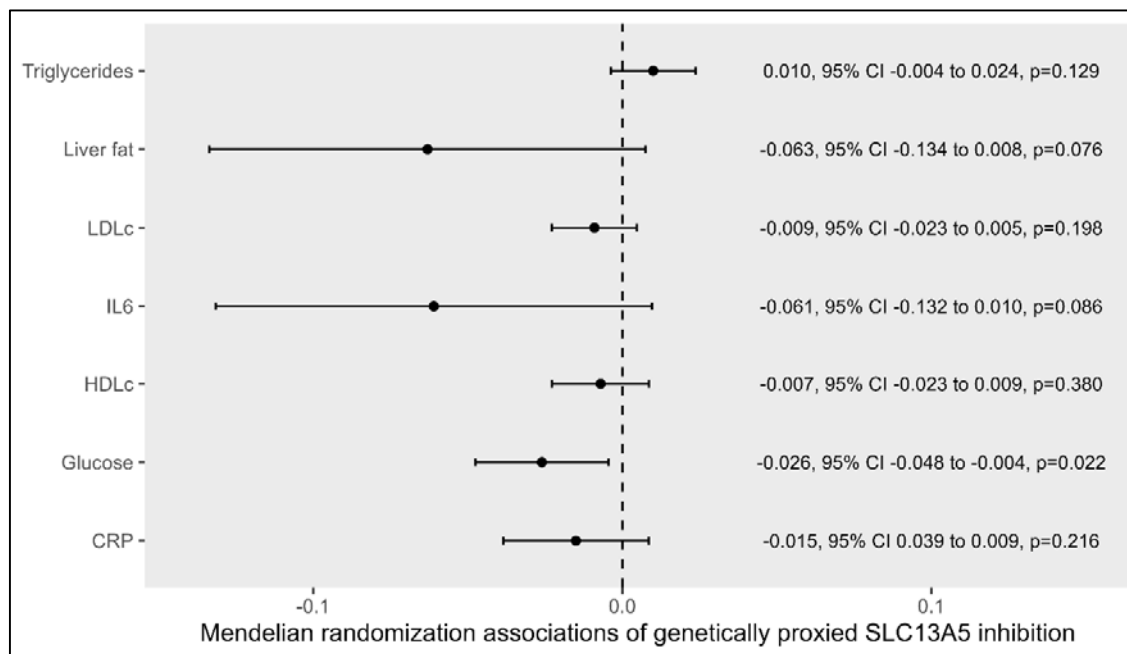

608

609 Mendelian randomization estimates are scaled per 1-standard deviation (SD) increase in plasma citrate through  
610 genetically proxied SLC13A5 inhibition. The units for fasting glucose is mmol/l, the units for C-reactive protein  
611 (CRP) is standard deviation (SD) change of log transformed levels, and the remaining exposures are measured  
612 in SD units. HDLc: high-density lipoprotein cholesterol, IL6: interleukin 6, LDLc: low-density lipoprotein  
613 cholesterol.

614

## 615 **Supplementary files**

- 616 Supplementary checklist. Strengthening the Reporting of Observational Studies in Epidemiology  
617 using Mendelian Randomization checklist.
- 618 Supplementary Table 1. Single-nucleotide polymorphisms used as instruments for SLC13A5  
619 inhibition. Genetic associations with plasma citrate are presented for variants within 200kB of the  
620 *SLC13A5* gene. SNP: single-nucleotide polymorphism.
- 621 Supplementary Table 2. Metabolome-wide Mendelian randomization analysis investigating the  
622 associations of genetically proxied SLC13A5 inhibition with plasma metabolites. CI: confidence  
623 interval.
- 624 Supplementary Table 3. Metabolome-wide Mendelian randomization analysis investigating the  
625 associations of genetically proxied SLC13A5 inhibition with urine metabolites. CI: confidence interval.
- 626 Supplementary Table 4. Proteome-wide Mendelian randomization analysis investigating the  
627 associations of genetically proxied SLC13A5 inhibition with plasma protein-binding aptamers.
- 628 Supplementary Table 5. Phenome-wide association study investigating the associations of a  
629 standardised genetic risk score for SLC13A5 inhibition with clinical outcomes across the phenome.
- 630 Supplementary Table 6. Single-nucleotide polymorphisms used as instruments for plasma citrate  
631 levels, selected from throughout the genome. SNP: single-nucleotide polymorphism.
- 632 Supplementary Table 7. Metabolome-wide Mendelian randomization analysis investigating the  
633 associations of genetically predicted plasma citrate levels with plasma metabolites. CI: confidence  
634 interval.
- 635 Supplementary Table 8. Metabolome-wide Mendelian randomization analysis investigating the  
636 associations of genetically predicted plasma citrate levels with urine metabolites. CI: confidence  
637 interval.
- 638 Supplementary Table 9. Proteome-wide Mendelian randomization analysis investigating the  
639 associations of genetically predicted plasma citrate levels with plasma protein-binding aptamers.
- 640 Supplementary Table 10. Phenome-wide association study investigating the associations of a  
641 standardised genetic risk score for plasma citrate with clinical outcomes across the phenome.
- 642 Supplementary Table 11. Mendelian randomization statistical sensitivity analyses for biomarkers of  
643 renal function, glucose and lipid metabolism, and inflammation.
- 644
